# Supplementary material for: In situ generation of Ni/Fe hydroxide layers by anodic etching of a Ni/Fe film for efficient oxygen evolution reaction
Source: Royal Society of Chemistry journal article supplement (doi:10.1039/d1nj05775h), 2022-01-01
Supplement: d1nj05775h1.pdf [file d1nj05775h1.pdf]

## In situ generation Ni/Fe hydroxide layers by anodic etching of Ni/Fe film for efficient oxygen evolution reaction

Ling Li<sup>a</sup>, Jing Wu<sup>a,b</sup>, Lieyuan Huang<sup>a</sup>, Gaoli lan<sup>a</sup>, Naxiang Wang<sup>a</sup>, Hui Zhang<sup>a</sup>, Xin Chen<sup>a</sup>, Xingbo Ge<sup>a,c\*</sup>

*a School of Chemistry and Chemical Engineering, Southwest Petroleum University, Chengdu, Sichuan 610500, P. R. China*

*b China Petroleum Pipeline Research Institute CO., LTD, Langfang, Hebei 065000, P. R. China*

*c Oil & Gas Field Applied Chemistry Key Laboratory of Sichuan Province, Southwest Petroleum University, Chengdu, Sichuan 610500, P. R. China*

\*Corresponding author.

Email: [xbge@swpu.edu.cn](mailto:xbge@swpu.edu.cn); Fax: 86-28-83037337; Tel: +86-28-83037337

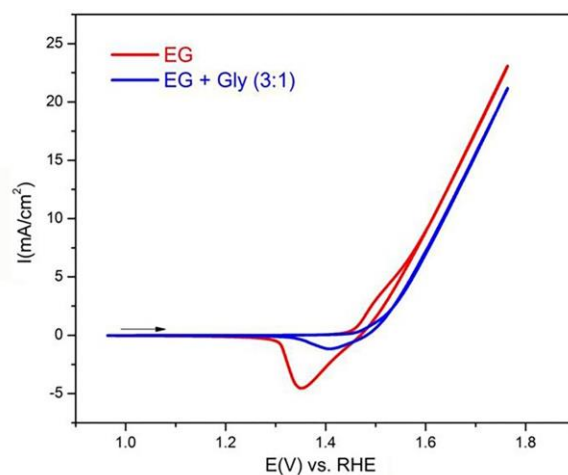

Figure S1. Effect of glycerol (Gly) in electrolyte studied by CV in 0.1 M KOH (scan rate of 20 mV s<sup>-1</sup>).

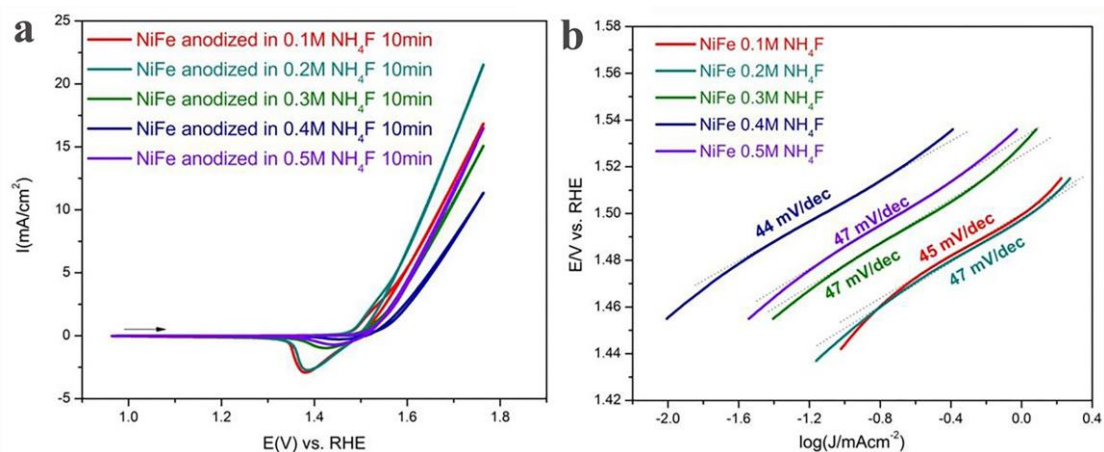

Figure S2. (a) CV curves and (b) Tafel plots of the different concentration of  $\text{NH}_4\text{F}$  in 0.1 M KOH (scan rate of 20  $\text{mV s}^{-1}$ ).

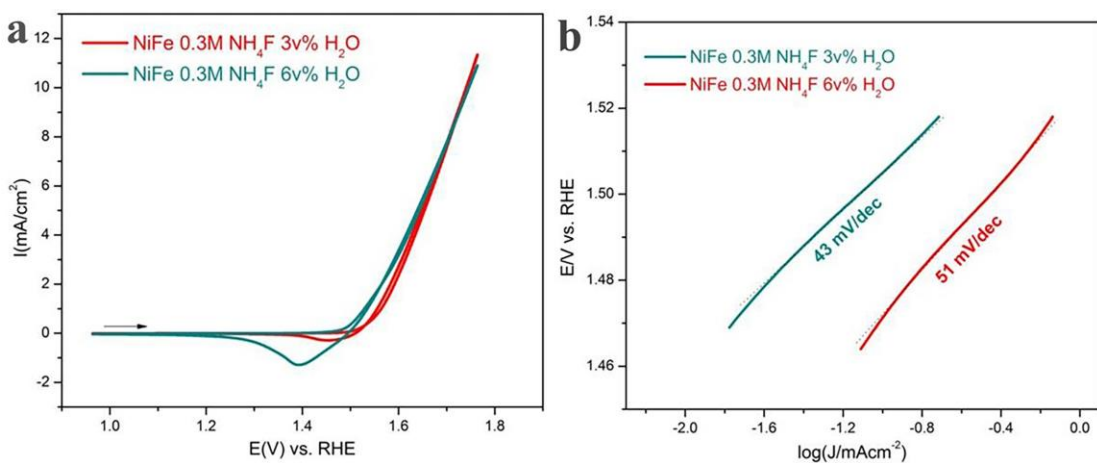

Figure S3. (a) CV curves and (b) Tafel plots of the different concentration of  $\text{H}_2\text{O}$  in 0.1 M KOH (scan rate of 20  $\text{mV s}^{-1}$ ).

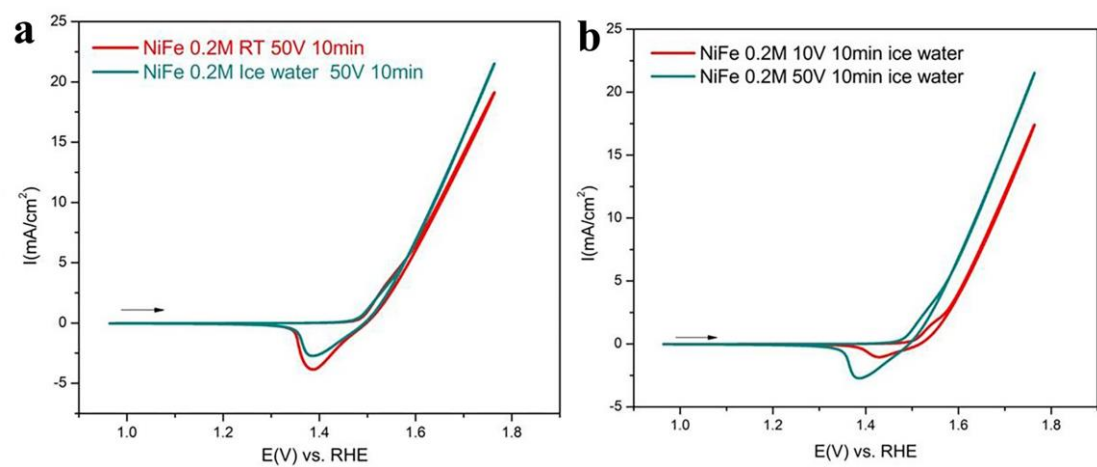

Figure S4. Effect of (a) temperature and (b) potential value during the anodization process studied by CV in 0.1 M KOH (scan rate of 20  $\text{mV s}^{-1}$ ).

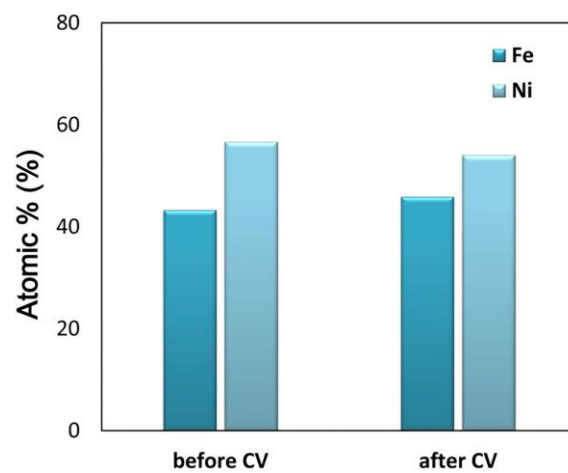

Figure S5. EDS results of fluorinated Ni/Fe (before CV treatment) and Ni/Fe hydroxide layers (after CV treatment).

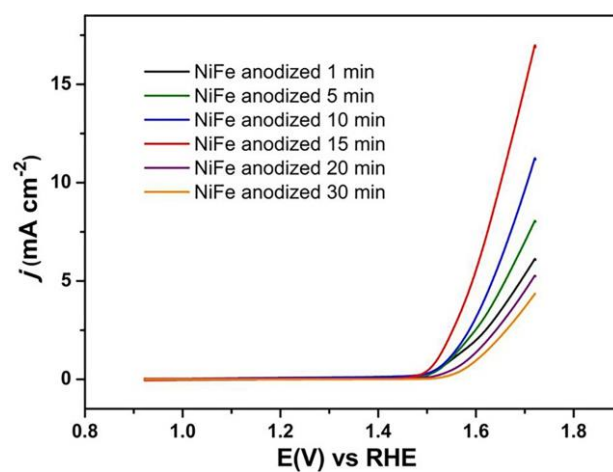

Figure S6. CV curves of the different anodizing time of NiFe alloy in 0.1 M KOH (scan rate of 20 mV s<sup>-1</sup>).

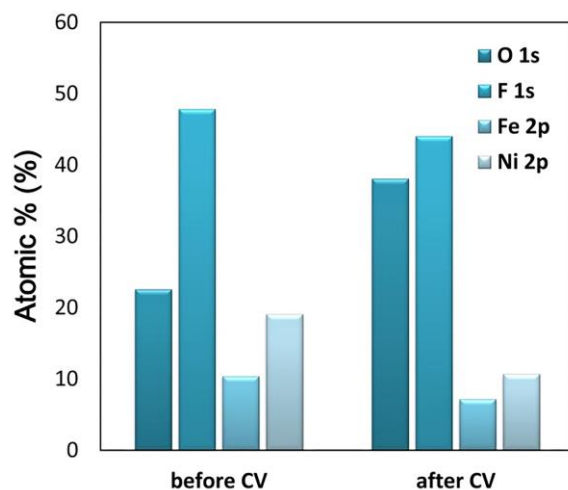

Figure S7. XPS results of surface atomic% of fluorinated Ni/Fe (before CV treatment) and Ni/Fe hydroxide layers (after CV treatment).

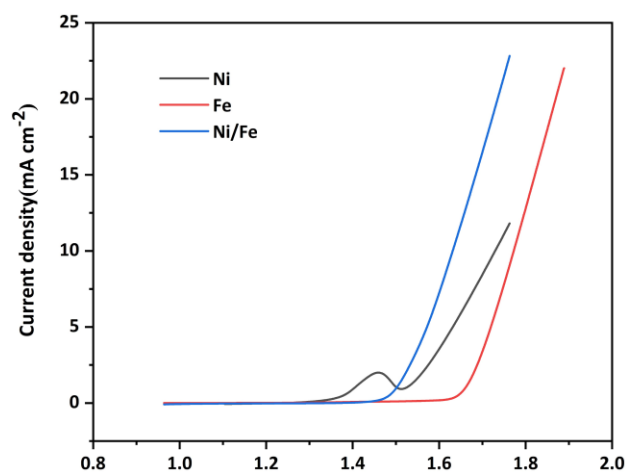

Figure S8. LSV polarization curves of Ni (the grey), Fe (the red) and Ni/Fe (the blue) under anodization and CV treatment for OER electrocatalytic activity in 0.1 M KOH.

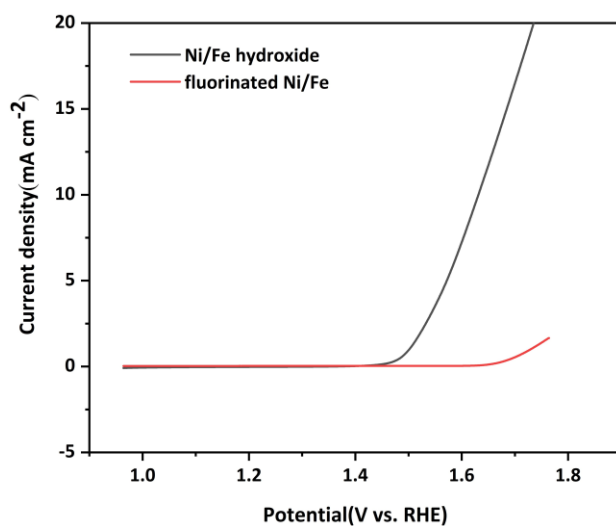

Figure S9. LSV polarization curves of Ni/Fe hydroxide and fluorinated Ni/Fe for OER electrocatalytic activity in 0.1 M KOH.

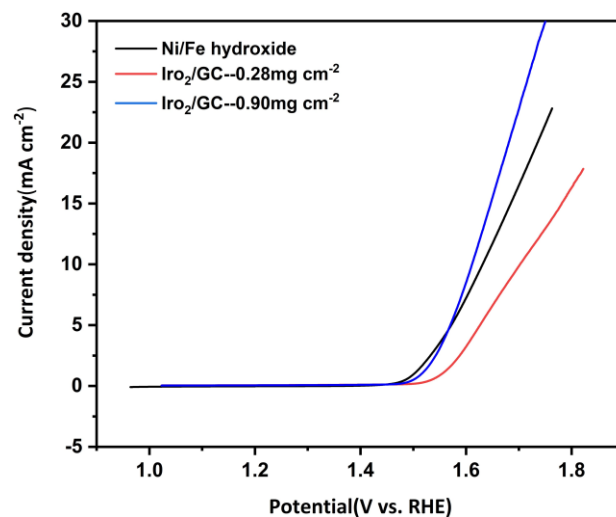

Figure S10. LSV polarization curves of Ni/Fe hydroxide (the black) and IrO<sub>2</sub> (loading mass: 0.90 mg cm<sup>-2</sup> (the blue), 0.28 mg cm<sup>-2</sup> (the red)) for OER electrocatalytic activity.

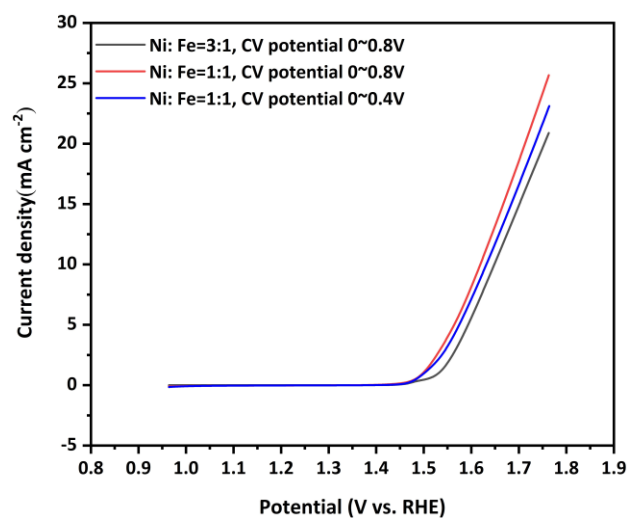

Figure S11. Effect of different Ni hydroxide/Fe hydroxide ratio for OER electrocatalytic activity studied by LSV in 0.1 M KOH.

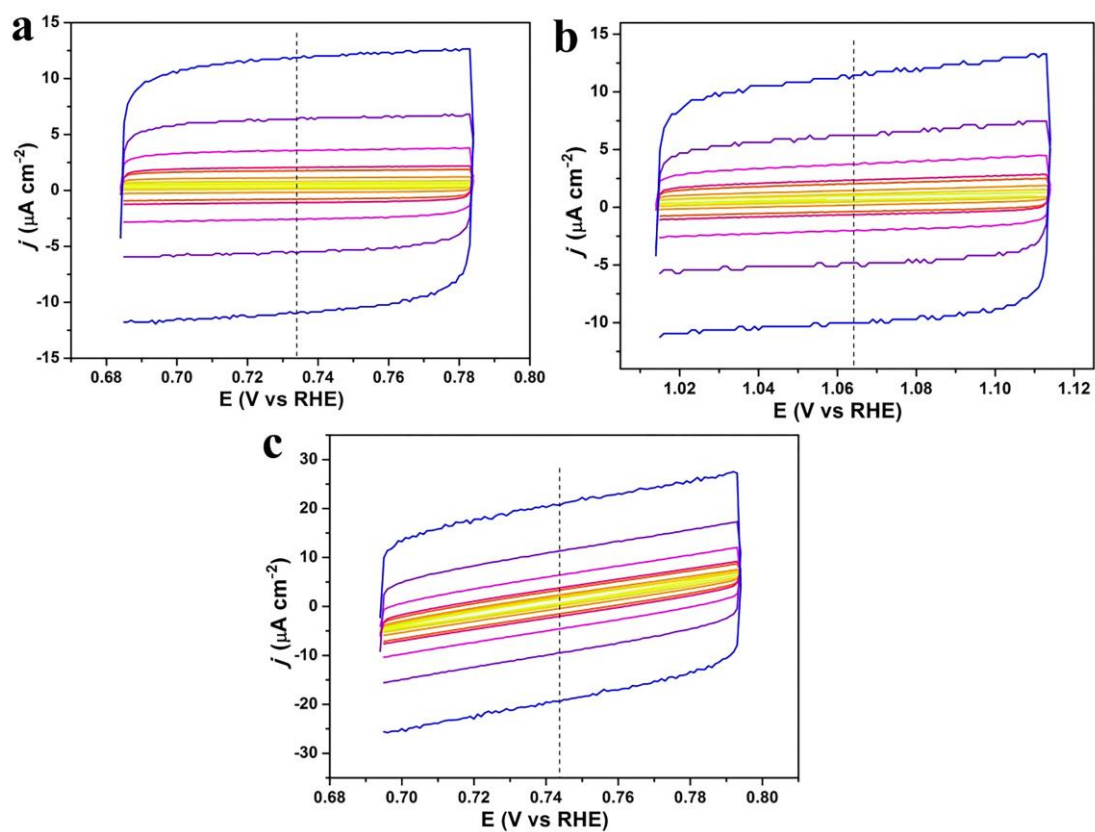

Figure S12. Capacitive CV of (a) NiFe alloy, (b) fluorinated Ni/Fe and (c) Ni/Fe hydroxide recorded at different scan rates, where no apparent faradaic process has taken place.

Table S1. Selected summary of NiFe-based OER catalyst.

| Catalyst                                                                               | Electrolyte | $\eta$ (mV) | Tafel slop<br>(mV dec <sup>-1</sup> ) | Ref.      |
|----------------------------------------------------------------------------------------|-------------|-------------|---------------------------------------|-----------|
| Ni/Fe hydroxide                                                                        | 0.1 M KOH   | 240         | 47                                    | This work |
| NiHCF                                                                                  | 0.1 M KOH   | 364         | 50                                    | [1]       |
| Ni/Fe-150                                                                              | 0.1 M KOH   | 341         | 68                                    | [1]       |
| Ni/Fe-300                                                                              | 0.1 M KOH   | 310         | 44                                    | [1]       |
| Ni/Fe-450                                                                              | 0.1 M KOH   | 342         | 57                                    | [1]       |
| Ni/Fe-600                                                                              | 0.1 M KOH   | 370         | 69                                    | [1]       |
| Sr <sub>2</sub> Fe <sub>1.3</sub> Ni <sub>0.2</sub> Mo <sub>0.5</sub> O <sub>6-6</sub> | 0.1 M KOH   | 360         | 59                                    | [2]       |
| NiFe-SW                                                                                | 1 M KOH     | 220         | 38.9                                  | [3]       |
| Ni-Fe LDH DSNCS                                                                        | 1 M KOH     | 272         | 71                                    | [4]       |
| NiFeO <sub>x</sub> (OH) <sub>y</sub>                                                   | 1 M KOH     | 250         | 39                                    | [5]       |
| FeOOH/LDH                                                                              | 1 M KOH     | 174         | 46                                    | [6]       |

Table S2. XPS results of the Ni/Fe ratio with different samples.

| Samples                         | Atomic (%) |       |
|---------------------------------|------------|-------|
|                                 | Ni         | Fe    |
| Ni: Fe=1:1, CV potential 0~0.8V | 55.42      | 44.58 |
| Ni: Fe=3:1, CV potential 0~0.8V | 89.53      | 10.47 |
| Ni: Fe=1:1, CV potential 0~0.4V | 59.14      | 40.86 |

## References

1. L. Y. Huang, X. B. Ge and S. Dong, *RSC Adv.*, 2017, 7, 32819-32825.
2. K. Zhu, T. Wu, M. Li, R. Lu, X. Zhu and W. Yang, *J. Mater. Chem. A.*, 2017, 5, 19836.
3. W. Zhang, Y. Z. Wu, J. Qi, M. X. Chen and R. Cao, *Adv. Energy Mater.*, 2017, 7, 1602547.
4. J. Zhang, L. Yu, Y. Chen, X. F. Lu, S. Gao and X. W. Lou, *Adv. Mater.* 2020, 32, 1906432.
5. H. Liao, P. Tan, R. Dong, M. Jiang, et al., *J. Colloid. Interf. Sci.*, 2021, 591, 307-313.
6. J. Chen, F. Zheng, S. J. Zhang, A. Fisher, et al., *ACS Catal.*, 2018, 8, 11342-11351.
